# Supplementary material
Source: Springer Nature journal article supplement (https://www.springermedizin.de/resource/supplementary/12879_2012_1987_MOESM1_ESM.pdf/9443534)
Supplement: MOESM1 [file 9443534]

19904 pregnant women's sera  
collected from 14 areas across  
Jiangsu, Aug. 2002-July 2004

6398 randomly selected

Qualitative test: HBsAg, a-HBs, a-HBc

HBsAg(+)  
429 (6.71%)

HBsAg(-)/a-HBs(+)/(-) /a-HBc(+)/(-)  
5969 (93.29%)

10 a-HBc(-)

419 a-HBc(+)

HBeAg test

Planned  
follow-up

All (-)

Excluded

125 (29.8%) (+)

294 (70.2%) (-)

453 from same area

90 (72.0%)

208 (70.7%)

298 (71.1%)

328 (72.4%)

Actual follow-up, Oct.  
2009-March 2010  
Children & mothers  
interviewed, sera
